# Supplementary material for: New insights in partial nitrification start-up revealed by a model based approach
Source: Royal Society of Chemistry journal article supplement (doi:10.1039/c5ra20743f), 2015-01-01
Supplement: c5ra20743f1.pdf [file c5ra20743f1.pdf]

## Online supporting information

### New insights in partial nitrification start-up revealed by model based approach

Jun Wu\*, Gang Yan, Guojing Zhou, Ting Xu

School of Environmental Engineering and science, Yangzhou University, 196 West Huayang Road, Yangzhou, Jiangsu, 225127, China. Tel: +86-514-87971389, Fax: +86-514-87978626, Email address: [j.wu@yzu.edu.cn](mailto:j.wu@yzu.edu.cn)

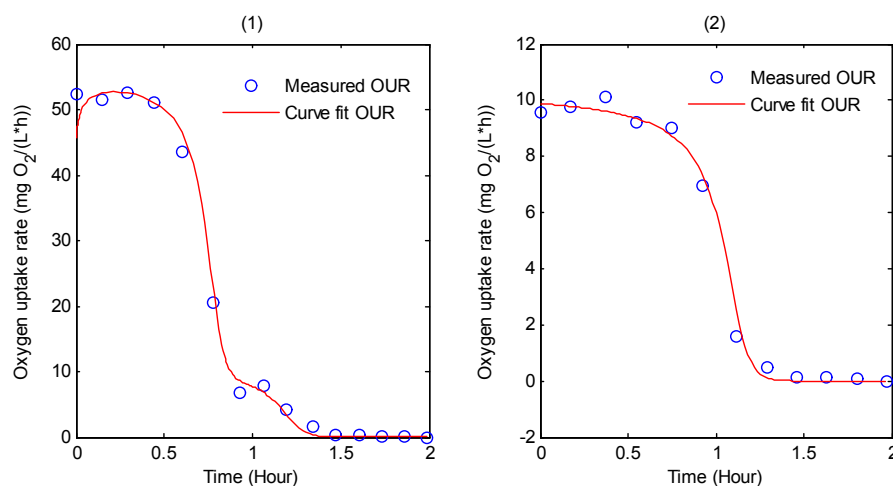

Fig. S1 - OUR measurement used for (1)  $Y_{AOB}$  and (2)  $Y_{NOB}$  experiment

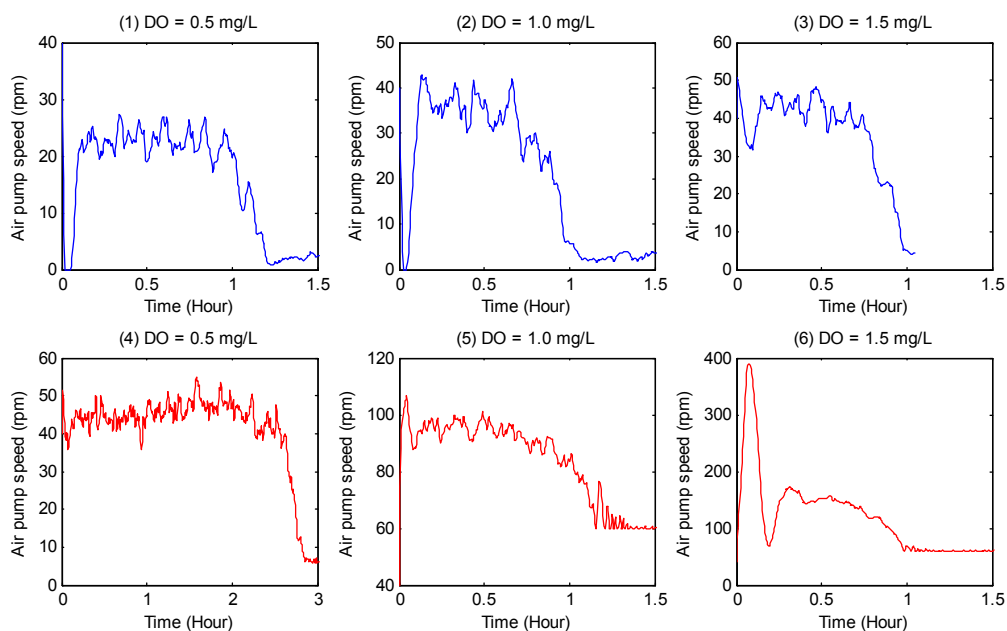

Fig.S2 - Air pump speed to maintain the desired DO concentration of 0.5, 1.0 and 1.5 mg/L during oxidation of  $N-NO_2^-$  (1-3) and  $N-NH_4^+$  (4-6)

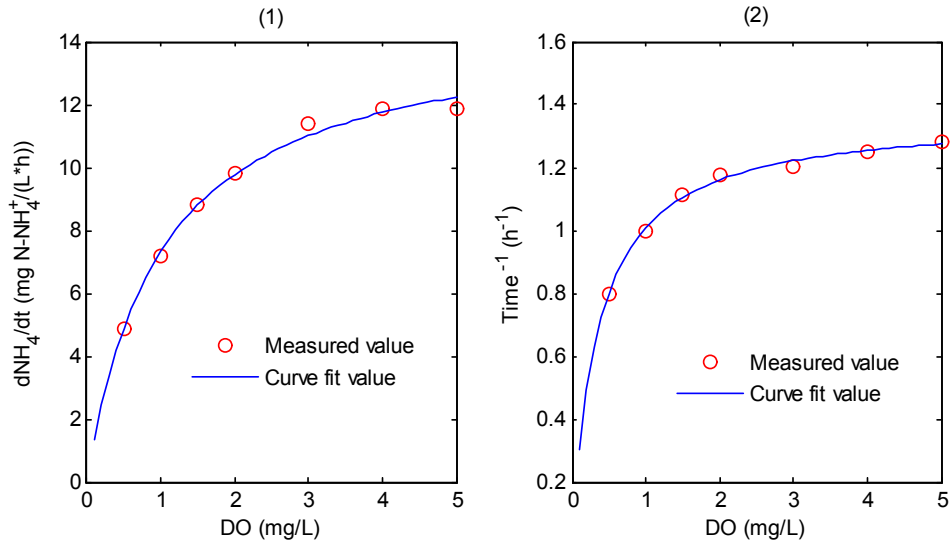

**Fig.S3** -  $\text{N-NH}_4^+$  and  $\text{N-NO}_2^-$  degradation rate at various DO concentration

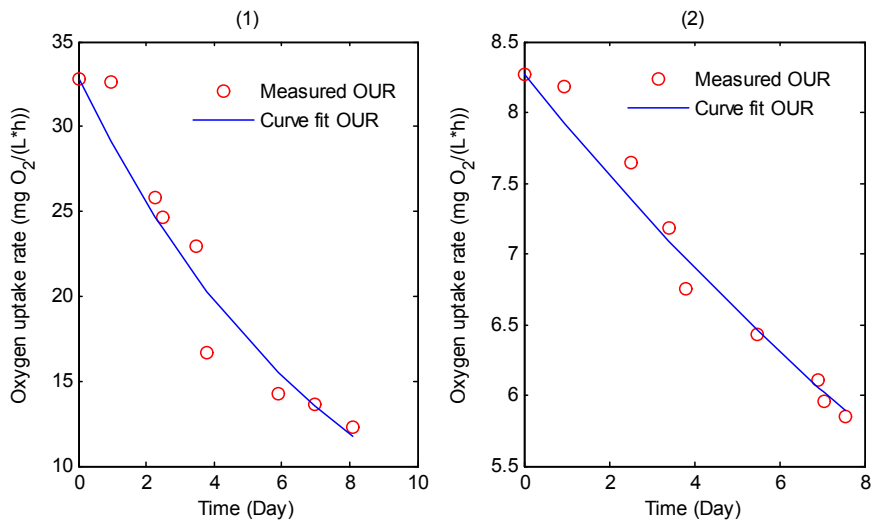

**Fig.S4** - OUR measurement used for (1)  $b_{\text{AOB}}$  and (2)  $b_{\text{NOB}}$  experiment

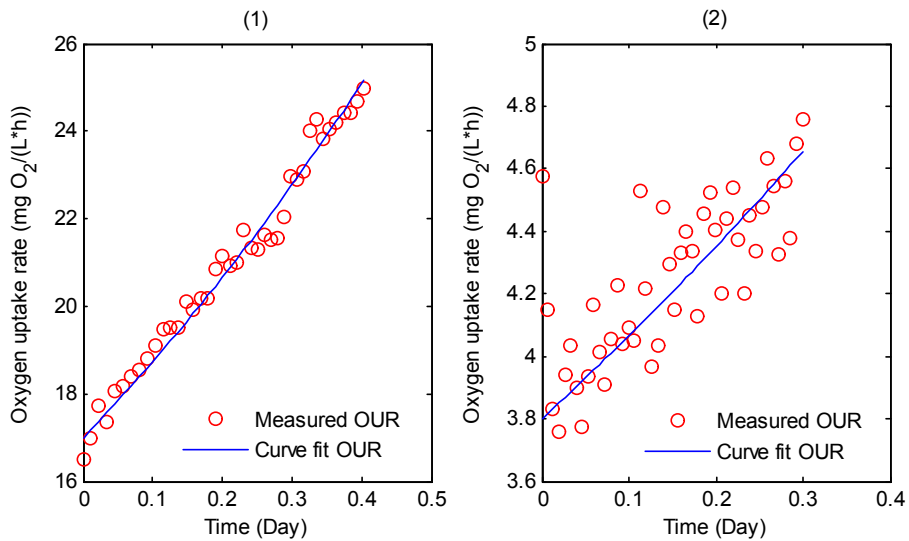

**Fig.S5** - OUR measurement used for (1)  $\mu_{\text{AOB}}$  and (2)  $\mu_{\text{NOB}}$  experiment
